# Supplementary material for: Ubiquitous Gasp1 overexpression in mice leads mainly to a hypermuscular phenotype
Source: PubMed Central journal article supplement (PMC3575399; doi:10.1186/1471-2164-13-541), 2012-10-10

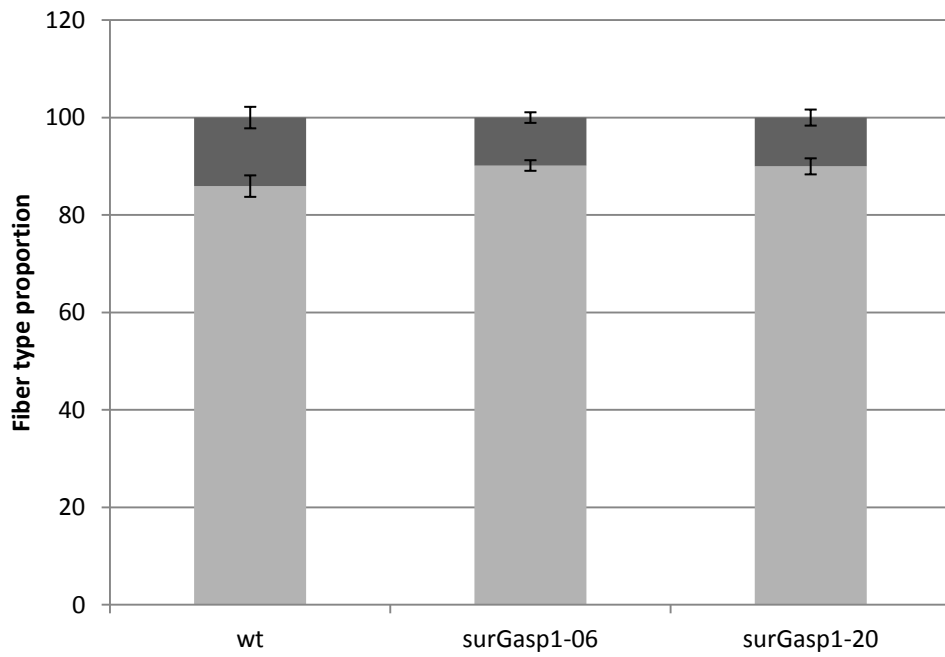

Supplement: 1471-2164-13-541-S1.pdf [file 1471-2164-13-541-S1.pdf]
