# Supplementary material for: Ubiquitous Gasp1 overexpression in mice leads mainly to a hypermuscular phenotype
Source: PubMed Central journal article supplement (PMC3575399; doi:10.1186/1471-2164-13-541), 2012-10-10
Supplement: 1471-2164-13-541-S3.pdf [file 1471-2164-13-541-S3.pdf]

**Table 1: List of the 96 genes that were measured on the TaqMan Low Density Arrays.**

| Assay                       | Type    |
|-----------------------------|---------|
| 18S-Hs99999901_s1           | Control |
| 2400001E08Rik-Mm01279964_g1 | Target  |
| Acvr1-Mm01331069_m1         | Target  |
| Acvr1b-Mm00475713_m1        | Target  |
| Acvr1c-Mm03023957_m1        | Target  |
| Acvr2a-Mm00431657_m1        | Target  |
| Acvr2b-Mm00431664_m1        | Target  |
| Aebp1-Mm00477402_m1         | Target  |
| Akt1-Mm01331626_m1          | Target  |
| Akt2-Mm02026778_g1          | Target  |
| Akt3-Mm00442194_m1          | Target  |
| Axin1-Mm01299063_m1         | Target  |
| Bmp2-Mm01340178_m1          | Target  |
| Bmp3-Mm00557790_m1          | Target  |
| Bmp4-Mm01321704_m1          | Target  |
| Casp9-Mm00516563_m1         | Target  |
| Ccnd1-Mm00432359_m1         | Target  |
| Ccne1-Mm00432367_m1         | Target  |
| Cdk2-Mm00443947_m1          | Target  |
| Cdk4-Mm00726334_s1          | Target  |
| Cdk6-Mm01311342_m1          | Target  |
| Ckm-Mm00432556_m1           | Target  |
| Ctnnb1-Mm00483033_m1        | Target  |
| Cyp2b10-Mm01972453_s1       | Target  |
| Dctn6-Mm00495994_m1         | Target  |
| Dffa-Mm00438410_m1          | Control |
| Fbxo32-Mm00499523_m1        | Target  |
| Fcgrt-Mm00438887_m1         | Control |
| Foxo1-Mm00490671_m1         | Target  |
| Foxo3-Mm01185722_m1         | Target  |
| Foxo4-Mm00840140_g1         | Target  |
| Fst-Mm00514982_m1           | Target  |
| Fstl3-Mm00473194_m1         | Target  |
| Gapdh-Mm99999915_g1         | Control |
| Gdf11-Mm01159973_m1         | Target  |
| Gsk3b-Mm00444911_m1         | Target  |
| Igf1-Mm01228180_m1          | Target  |
| Igf1r-Mm00802831_m1         | Target  |
| Igf2-Mm00580426_m1          | Target  |
| Inha-Mm00439683_m1          | Target  |
| Inhbb-Mm01286587_m1         | Target  |
| Map2k2-Mm00445688_m1        | Target  |
| Map2k3-Mm00435950_m1        | Target  |
| Map2k4-Mm00436508_m1        | Target  |
| Map2k5-Mm00488652_m1        | Target  |
| Map2k6-Mm00803694_m1        | Target  |
| Mapk1-Mm00442479_m1         | Target  |
| Mapk10-Mm00436518_m1        | Target  |
| Mapk3-Mm01973540_g1         | Target  |
| Mapk7-Mm00839961_g1         | Target  |

|                       |         |
|-----------------------|---------|
| Mapk8-Mm00489514_m1   | Target  |
| Mapk9-Mm00444239_m1   | Target  |
| Mdm2-Mm01233136_m1    | Target  |
| Mstn-Mm01254559_m1    | Target  |
| Mtor-Mm00444968_m1    | Target  |
| Myf5-Mm00435125_m1    | Target  |
| Myf6-Mm00435126_m1    | Target  |
| Myh1-Mm01332489_m1    | Target  |
| Myh13-Mm01329439_m1   | Target  |
| Myh2-Mm01332564_m1    | Target  |
| Myh3-Mm01332463_m1    | Target  |
| Myh4-Mm01332518_m1    | Target  |
| Myh6-Mm00440359_m1    | Target  |
| Myh7-Mm00600555_m1    | Target  |
| Myh7b-Mm01249941_m1   | Target  |
| Myh8-Mm01329494_m1    | Target  |
| Myod1-Mm00440387_m1   | Target  |
| Myog-Mm00446194_m1    | Target  |
| Nodal-Mm00443040_m1   | Target  |
| Pak2-Mm01170646_m1    | Target  |
| Pax3-Mm00435493_m1    | Target  |
| Pax7-Mm00834079_m1    | Target  |
| Pdpk1-Mm00440707_m1   | Target  |
| Pparg-Mm01184322_m1   | Target  |
| Rps6kb1-Mm01310033_m1 | Target  |
| Smad1-Mm00484721_m1   | Target  |
| Smad2-Mm00487530_m1   | Target  |
| Smad3-Mm01170760_m1   | Target  |
| Smad4-Mm03023996_m1   | Target  |
| Smad5-Mm03024001_g1   | Target  |
| Smad6-Mm00484738_m1   | Target  |
| Smad7-Mm00484742_m1   | Target  |
| Smad9-Mm00649885_m1   | Target  |
| Smurf1-Mm00547102_m1  | Target  |
| Smurf2-Mm03024086_m1  | Target  |
| Syp-Mm00436850_m1     | Target  |
| Tbp-Mm00446973_m1     | Control |
| Tgfb1-Mm01178819_m1   | Target  |
| Tgfb2-Mm00436955_m1   | Target  |
| Tgfbr1-Mm00436964_m1  | Target  |
| Tgfbr2-Mm00436977_m1  | Target  |
| Tgfbr3-Mm00803538_m1  | Target  |
| Tnf-Mm00443258_m1     | Target  |
| Trim63-Mm01185221_m1  | Target  |
| Wfikkn1-Mm01308311_m1 | Target  |
| Wfikkn2-Mm00725281_m1 | Target  |
